# Supplementary material
Source: Springer Nature journal article supplement (https://www.springermedizin.de/resource/supplementary/13223_2011_252_MOESM2_ESM.pdf/9597514)

# DRESS - Eosinophils and Creatinine Levels

■ Eosinophils (x 10<sup>9</sup>/L) ● Creatinine (μmol/L)

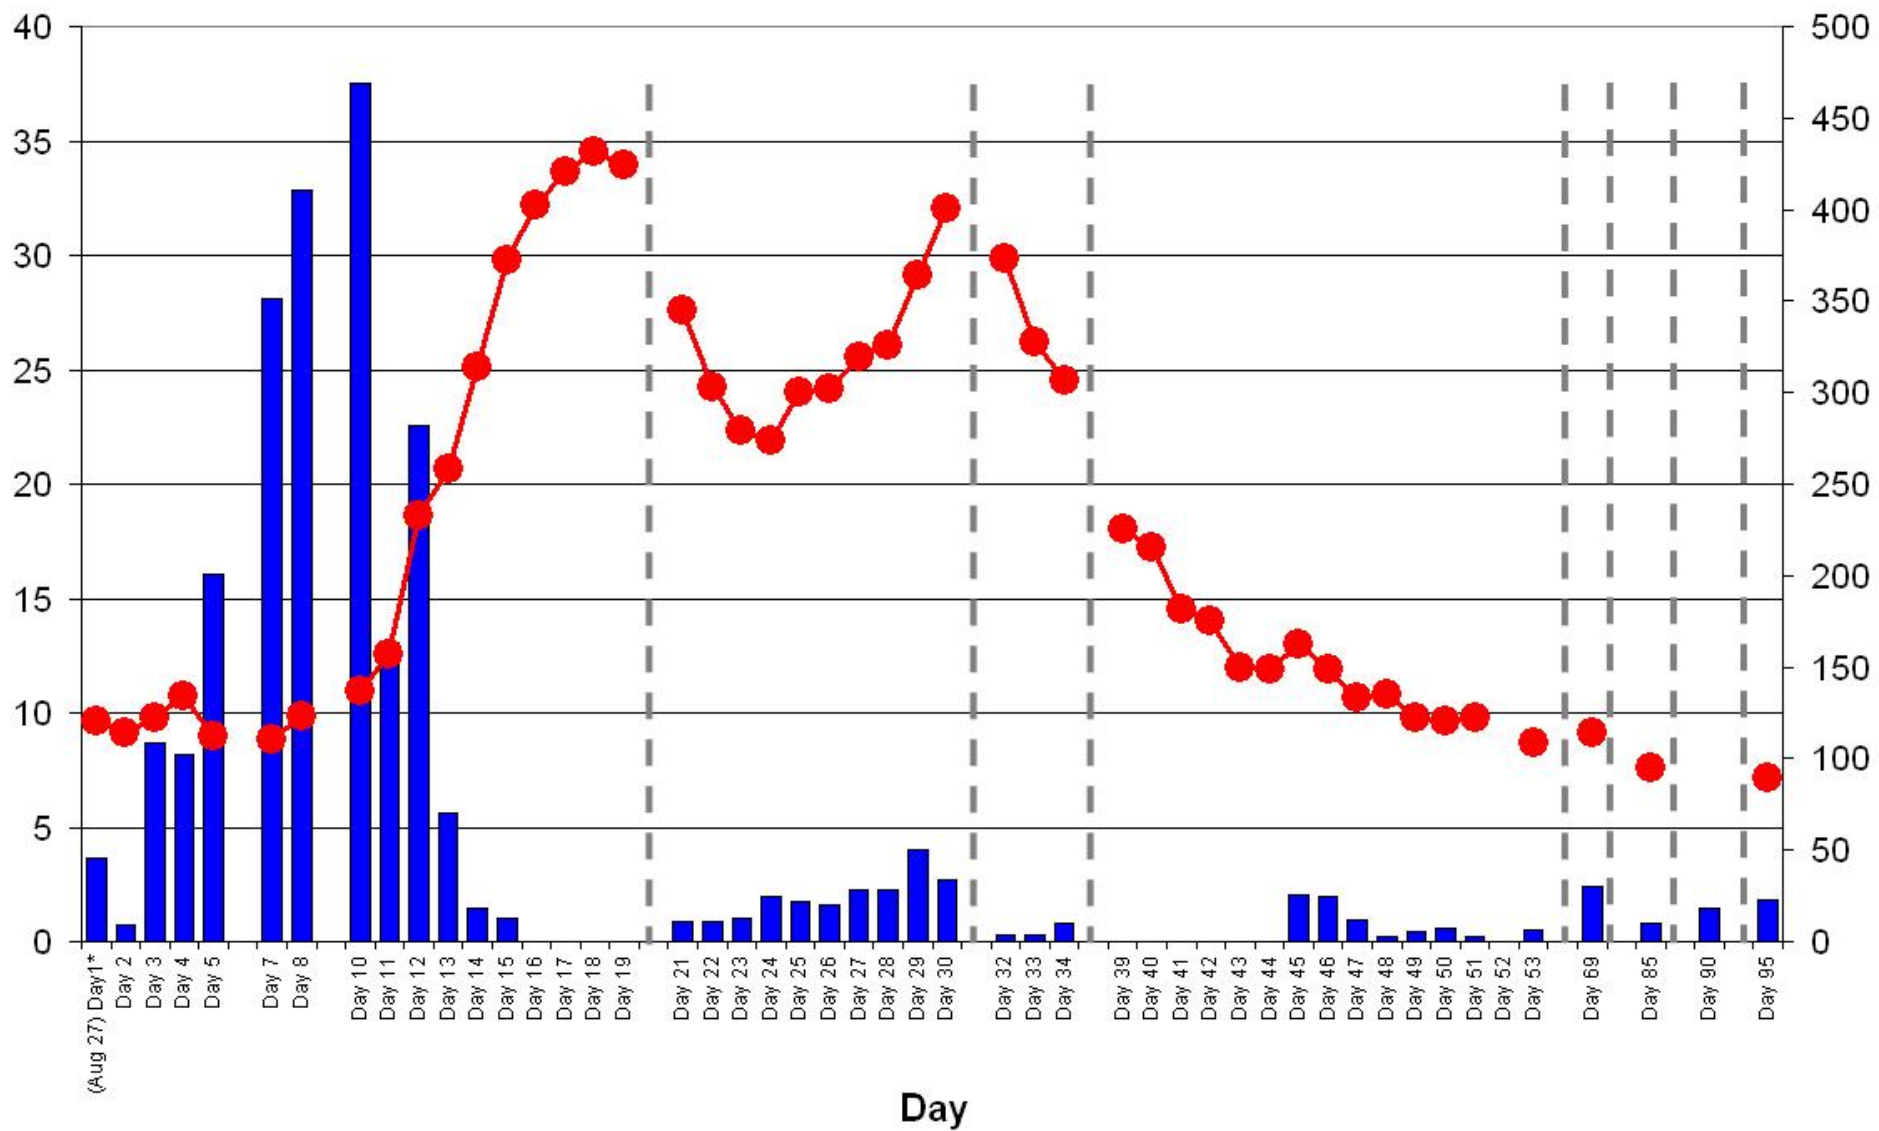

Supplement: MOESM2 [file 9597514]
